# Supplementary material
Source: Springer Nature journal article supplement (https://www.springermedizin.de/resource/supplementary/12889_2011_3590_MOESM3_ESM.pdf/9489390)
Supplement: MOESM3 [file 9489390]

**Receives  
intervention?**

*yes*

*no*

**Drops out?**

*yes*

*no*

**Intervention  
effective?**

*no*

*yes*

**Recidivism?**

*yes*

*no*

*yes*

**No  
problems**

---

**Recovers without  
intervention?**

*no*

**Problems  
persist**

---
